# Supplementary material for: Effect of asthma, COPD, and ACO on COVID-19: A systematic review and meta-analysis
Source: PubMed Central journal article supplement (PMC9624422; doi:10.1371/journal.pone.0276774), 2022-11-01

**S1 Fig. Forrest plots for prevalence of asthma among patients with COVID-19.**

**a. USA**

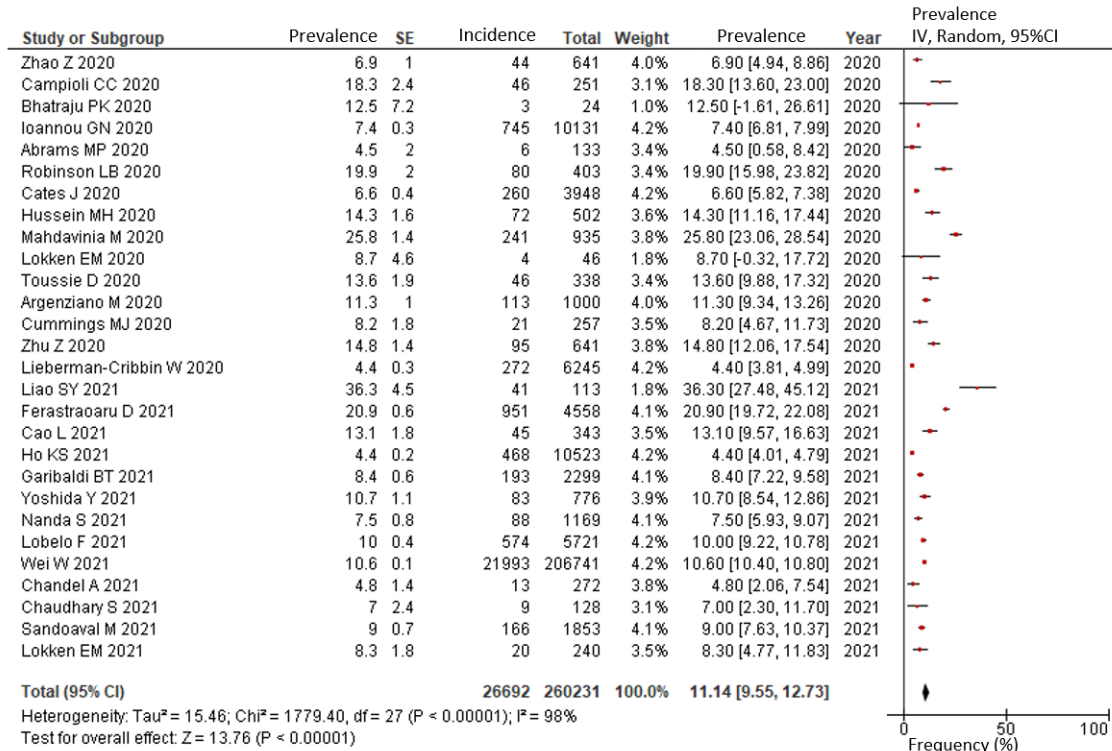

**b. Mexico**

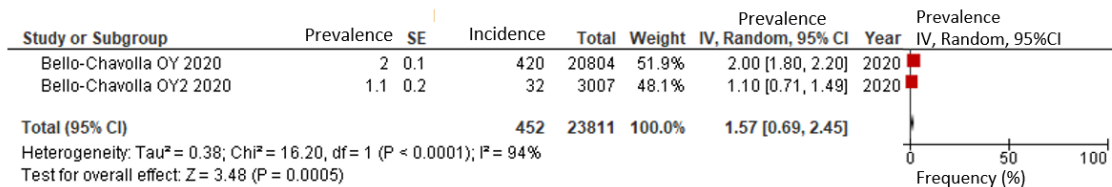

**c. UK**

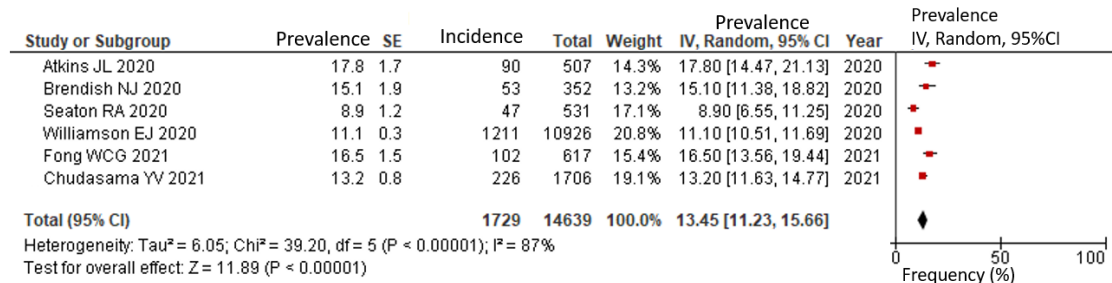

d. Italy

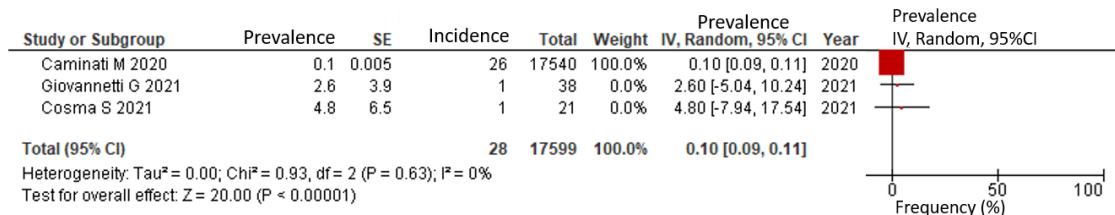

e. Spain

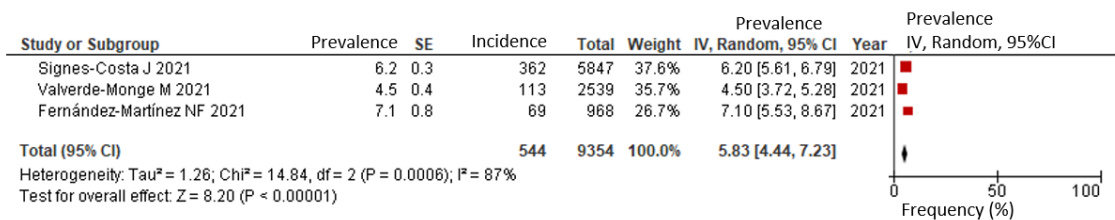

f. France

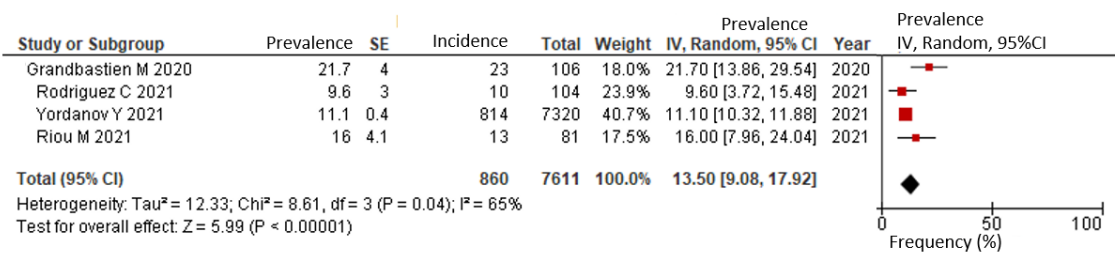

g. Netherland

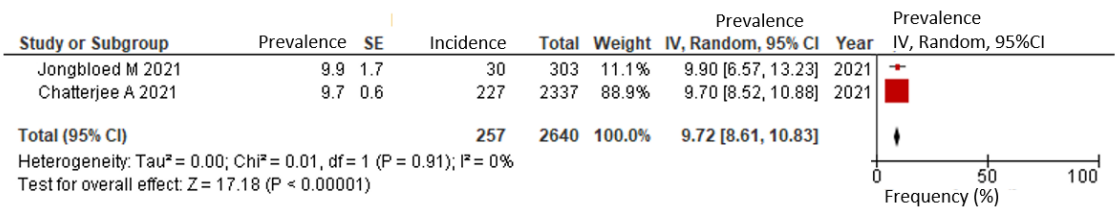

h. China

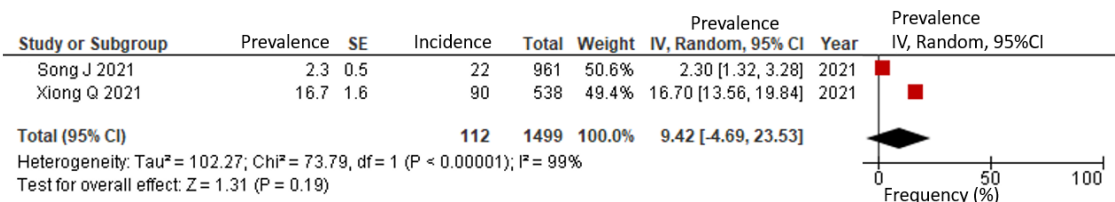

i. India

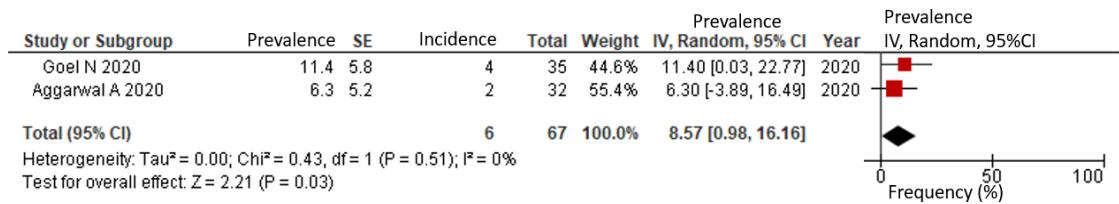

j. Turkey

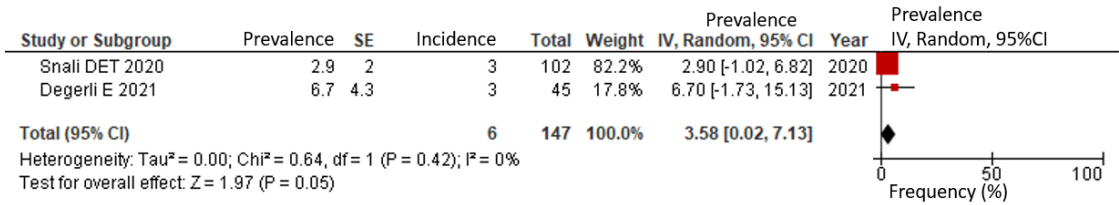

k. Korea

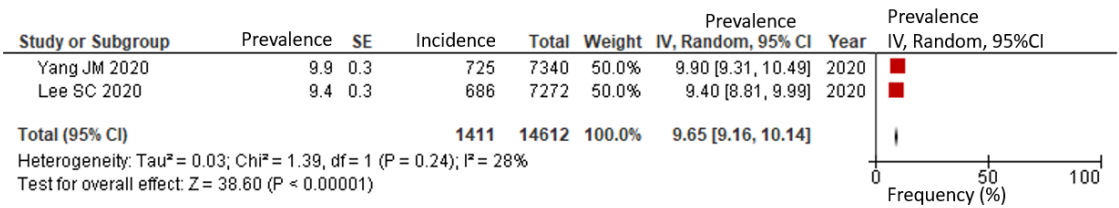

Supplement: pone.0276774.s003.pdf [file pone.0276774.s003.pdf]
