# Supplementary material for: Effect of asthma, COPD, and ACO on COVID-19: A systematic review and meta-analysis
Source: PubMed Central journal article supplement (PMC9624422; doi:10.1371/journal.pone.0276774), 2022-11-01

## S2 Fig. Forrest plots for prevalence of COPD among patients with COVID-19.

### a. USA

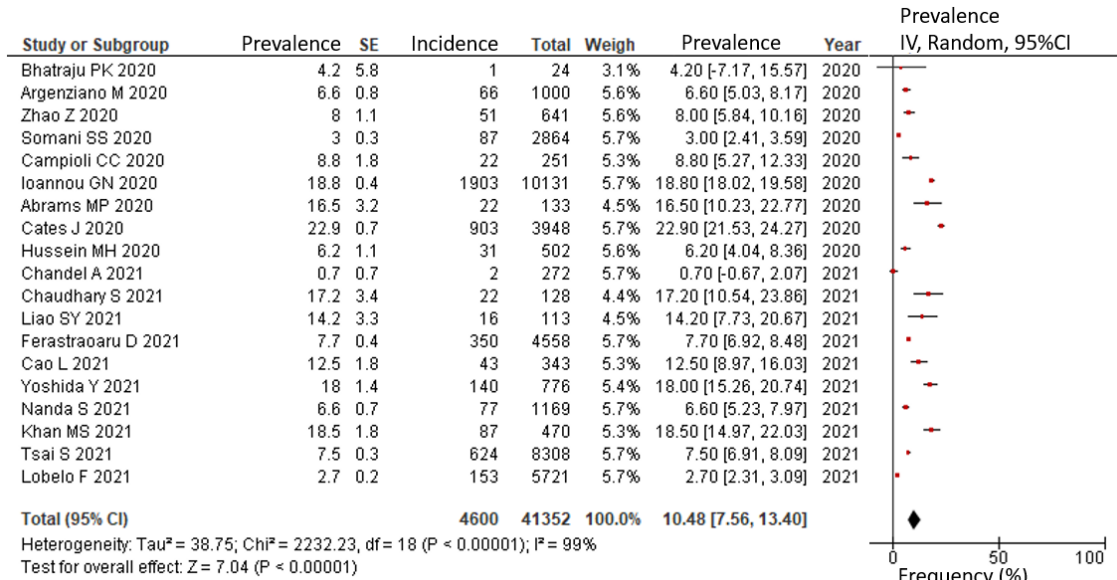

### b. Mexico

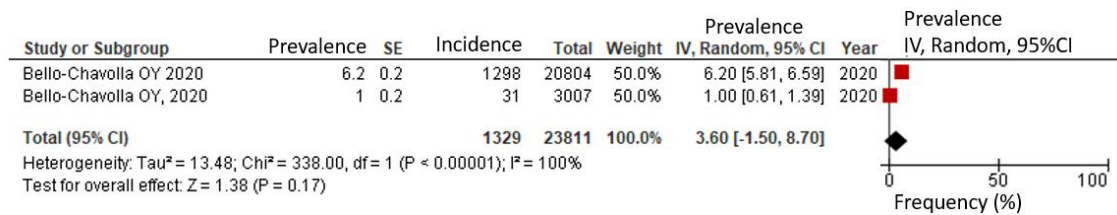

### c. UK

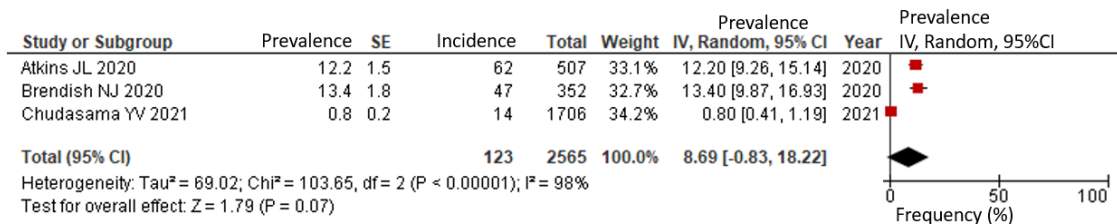

### d. Spain

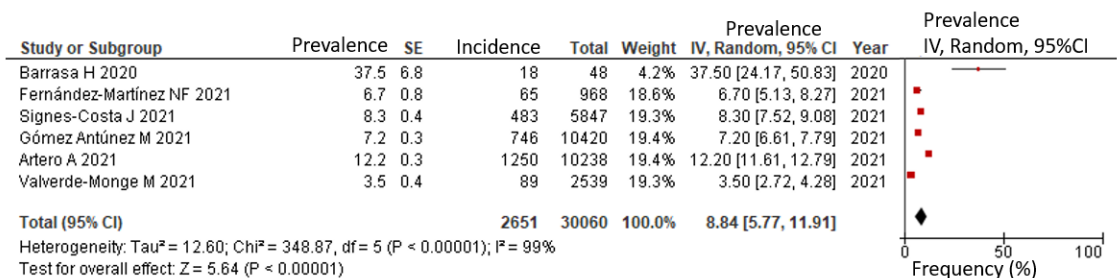

e. Italy

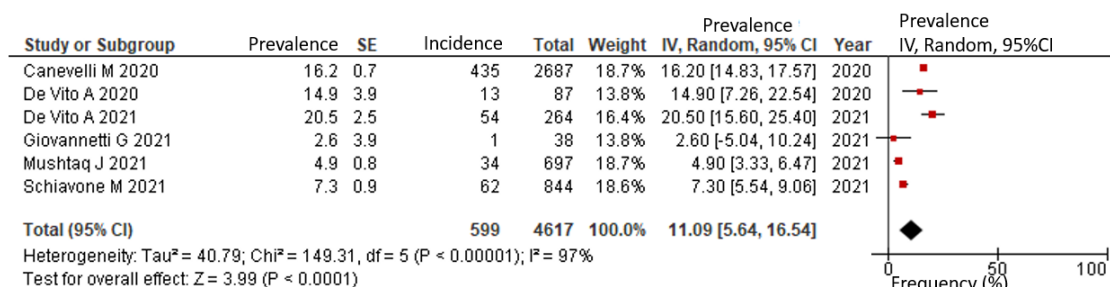

f. France

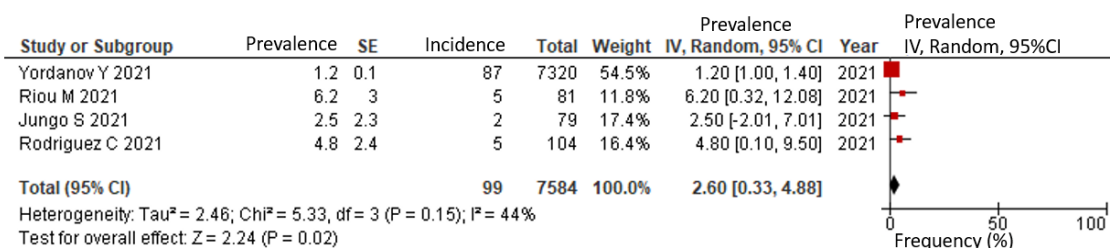

g. Netherland

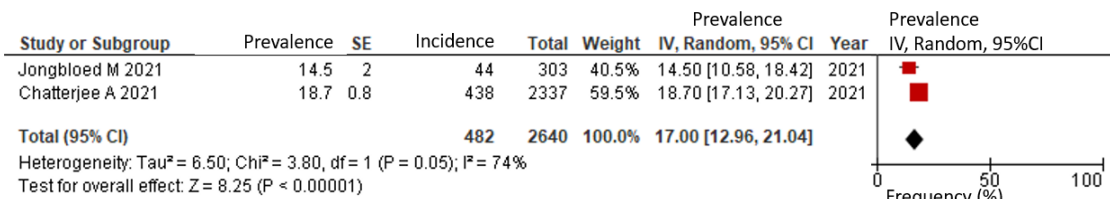

h. China

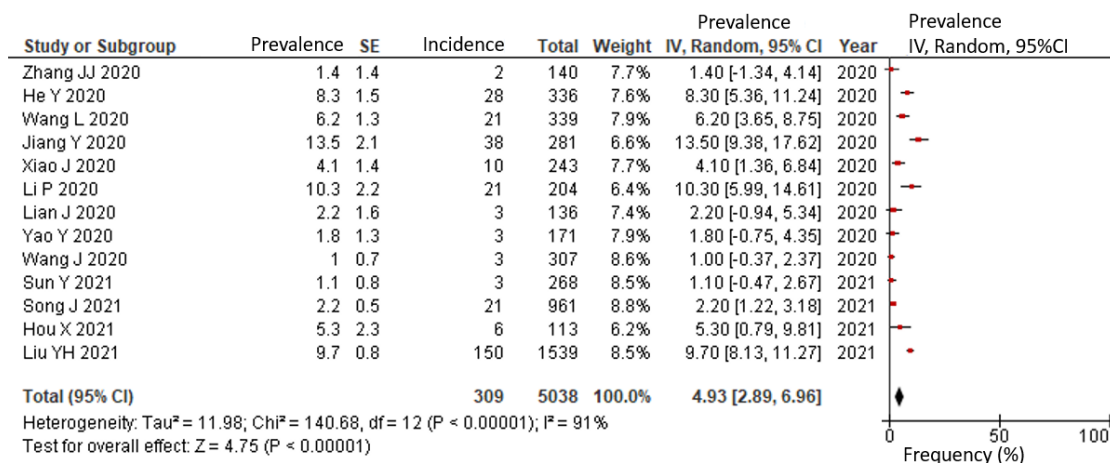

i. Turkey

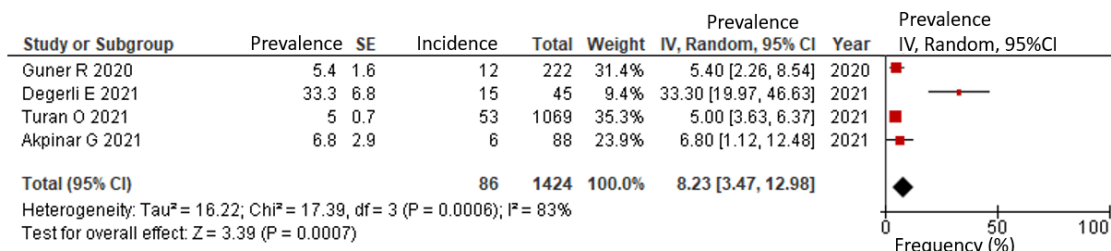

j. India

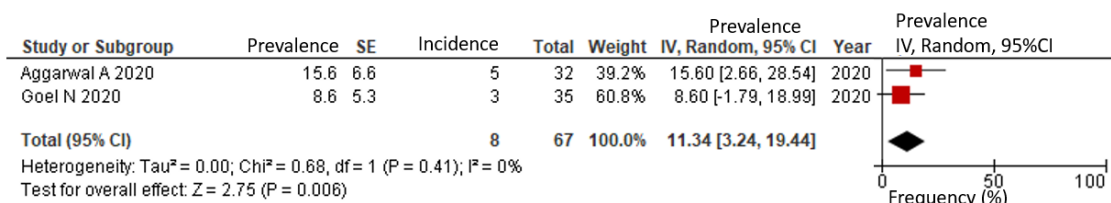

k. Korea

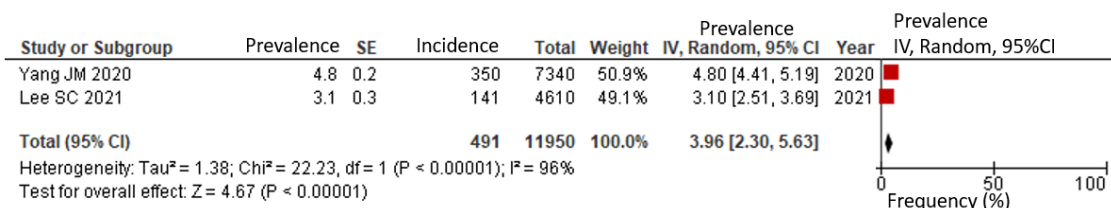

l. Iran

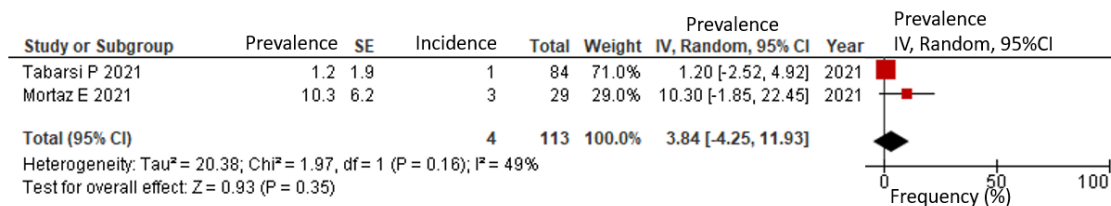

Supplement: pone.0276774.s004.pdf [file pone.0276774.s004.pdf]
