# Supplementary material for: Effect of asthma, COPD, and ACO on COVID-19: A systematic review and meta-analysis
Source: PubMed Central journal article supplement (PMC9624422; doi:10.1371/journal.pone.0276774), 2022-11-01

**S3 Fig. Forrest plots for prevalence of ACO among patients with COVID-19.**

a. USA

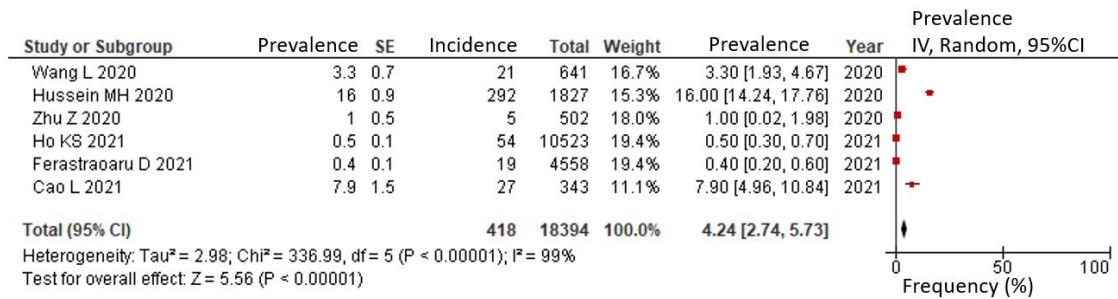

b. UK

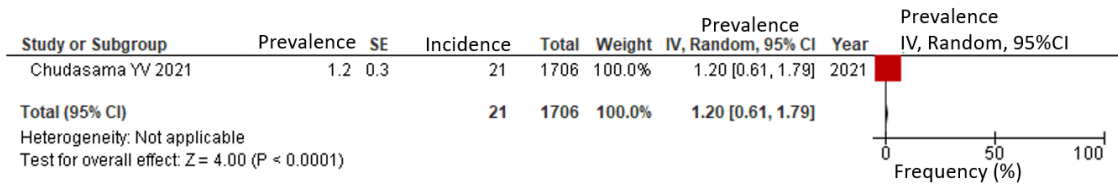

Supplement: pone.0276774.s005.pdf [file pone.0276774.s005.pdf]
